# Supplementary material for: Targeted transcutaneous spinal cord stimulation promotes persistent recovery of upper limb strength and tactile sensation in spinal cord injury: a pilot study
Source: Frontiers journal article supplement (doi:10.3389/fnins.2023.1210328), 2023-07-07
Supplement: Image_1.pdf [file Image_1.pdf]

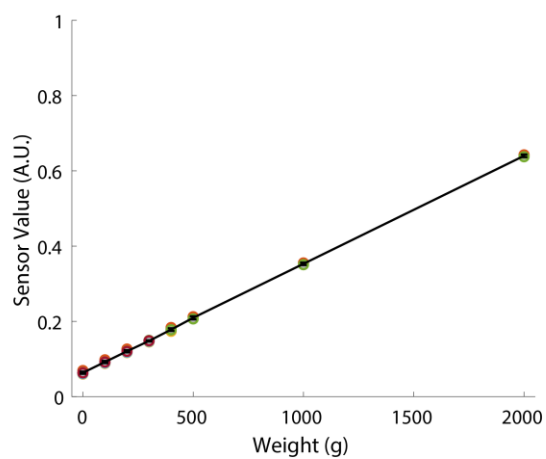

**Supplementary Figure 1.** Calibration curves for the sensor used in this study. Each color signifies a calibration test done on a different day. Black line signifies average calibration across days. Error bars shown are standard deviations.
