# Supplementary material for: Targeted transcutaneous spinal cord stimulation promotes persistent recovery of upper limb strength and tactile sensation in spinal cord injury: a pilot study
Source: Frontiers journal article supplement (doi:10.3389/fnins.2023.1210328), 2023-07-07
Supplement: Image_2.pdf [file Image_2.pdf]

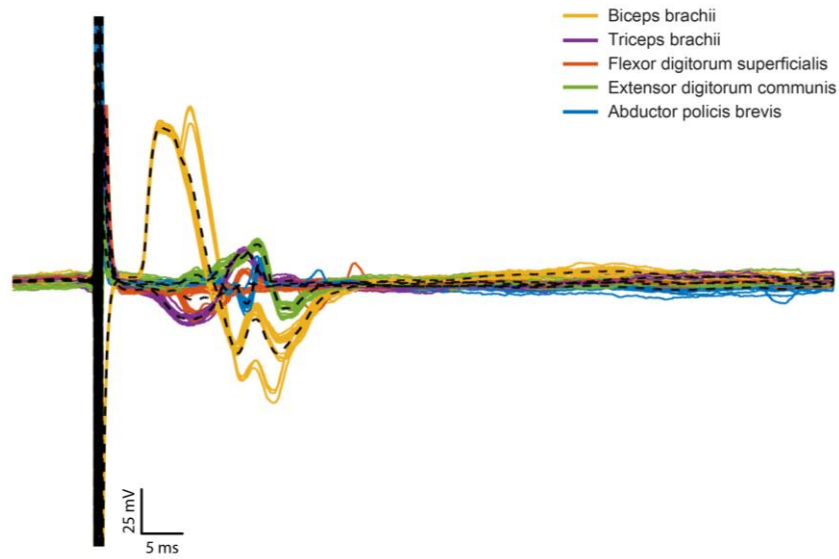

**Supplementary Figure 2.** Example trace of muscle recruitment profile of the 5 muscles upon tSCS stimulation. This was for participant CTS02 when stimulated at 10.2 cm at 150 mA. Colored traces indicate the reflex activity evoked in each of the 5 muscles as shown in the legend. Dashed black line shows average of all the trials.
