# Supplementary material for: Targeted transcutaneous spinal cord stimulation promotes persistent recovery of upper limb strength and tactile sensation in spinal cord injury: a pilot study
Source: Frontiers journal article supplement (doi:10.3389/fnins.2023.1210328), 2023-07-07
Supplement: Image_3.pdf [file Image_3.pdf]

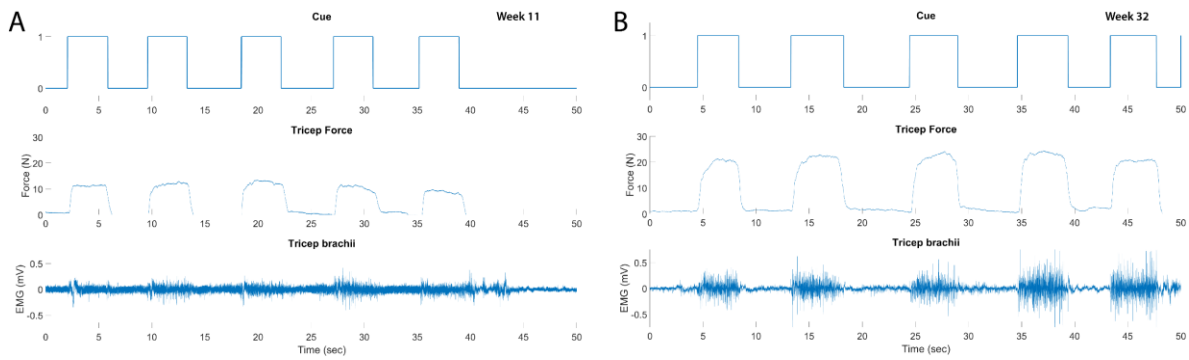

**Supplementary Figure 3.** Example traces of cue, force measured during tricep extension and EMG recorded from triceps brachii for participant CTS02 from A) week 11 and B) week 32.
